# Supplementary material
Source: PubMed Central journal article supplement (PMC5286949)
Supplement: 2016.150987.COUBEBAISSE_SUPPL.pdf [file 2016.150987.COUBEBAISSE_SUPPL.pdf]

**Carboxy-terminal fragment of fibroblast growth factor 23 induces heart hypertrophy in sickle cell disease**

Marie Courbebaisse,<sup>1,2,3,4</sup> Hind Mehel,<sup>2</sup> Camille Petit-Hoang,<sup>2</sup> Jean-Antoine Ribeil,<sup>5</sup> Laurent Sabbah,<sup>6</sup> Véronique Tuloup-Minguez,<sup>2</sup> David Bergerat,<sup>2</sup> Jean-Benoit Arlet,<sup>7,8</sup> Aurélie Stanislas,<sup>5</sup> Jean-Claude Souberbielle,<sup>2,3</sup> Hervé Le Clésiau,<sup>9</sup> Rodolphe Fischmeister,<sup>10</sup> Gérard Friedlander<sup>1,2,4</sup> and Dominique Prié<sup>1,2,3</sup>

<sup>1</sup>Université Paris Descartes, Sorbonne-Paris-Cité, Faculté de Médecine, Paris; <sup>2</sup>INSERM U1151-CNRS UMR8253, Paris; <sup>3</sup>Service de Physiologie Explorations Fonctionnelles Hôpital Necker-Enfants Malades Assistance Publique-Hôpitaux de Paris; <sup>4</sup>Service de Physiologie Explorations Fonctionnelles Hôpital Européen Georges Pompidou, Assistance Publique-Hôpitaux de Paris; <sup>5</sup>Département de Biothérapie, Hôpital Necker-Enfants Malades Assistance Publique-Hôpitaux de Paris; <sup>6</sup>Unité Fonctionnelle de Cardiologie Adultes, Hôpital Necker-Enfants Malades Assistance Publique-Hôpitaux de Paris; <sup>7</sup>Service de Médecine Interne, Hôpital Européen Georges Pompidou, Assistance Publique-Hôpitaux de Paris; <sup>8</sup>INSERM U1163, CNRS 8254, Institut IMAGINE, Paris; <sup>9</sup>Centre de Santé et d'Assurance Maladie Agence de Seine-Saint-Denis, Bobigny and <sup>10</sup>INSERM UMR-S 1180 Université Paris-Sud, Université Paris-Saclay, Châtenay-Malabry, France

Correspondence: dominique.prie@inserm.fr  
doi:10.3324/haematol.2016.150987

Table 1: Comparisons of the control group and SCD patients according to haemoglobin anomalies

|                                            | <b>Sickle cell disease group</b><br><b>n = 77</b> | <b>Control group</b><br><b>n = 172</b> | <b>P</b> | <b>SS group</b><br><b>n=52</b> | <b>SB, SC, SD group</b><br><b>n=25</b> | <b>P</b> |
|--------------------------------------------|---------------------------------------------------|----------------------------------------|----------|--------------------------------|----------------------------------------|----------|
| Age (years)                                | 29.4 ± 9.3                                        | 32.2 ± 8.4                             | 0.0249   | 28.8 ± 8.6                     | 30.5 ± 10.6                            | 0.5023   |
| Gender (male)                              | 37.7% (29)                                        | 40.0% (69)                             | 0.78     | 36.5% (19)                     | 40.0 % (10)                            | 0.8054   |
| BMI (kg/m <sup>2</sup> )                   | 22.3 ± 3.6                                        | 26.9 ± 4.2                             | <0.0001  | 21.4 ± 2.8                     | 24.2 ± 4.3                             | 0.0059   |
| Systolic blood pressure (mmHg)             | 117.5 ± 11.7                                      | 124.5 ± 13.1                           | 0.0011   | 117.2 ± 11.4                   | 118.1 ± 12.6                           | 0.5781   |
| Diastolic blood pressure (mmHg)            | 68.4±8.6;                                         | 78.7±9.2                               | <0.0001  | 68 ± 9.8                       | 69.1 ± 5.2                             | 0.7822   |
| Hemoglobin (g/dL)                          | 9.2±2.0                                           | 13.5±1.7                               | <0.0001  | 8.4 ± 1.5                      | 11.0 ± 1.8                             | <0.0001  |
| Mean corpuscular volume (µm <sup>3</sup> ) | 80.8±12.3                                         | 84.2±6.2                               | 0.0261   | 83.7 ± 13.3                    | 74.9 ± 6.9                             | 0.0003   |
| Serum ferritin (µg/L)                      | 160 [8-3555]                                      | 60.0 [6.0-409.0]                       | <0.0001  | 166 [25-3555]                  | 108 [8-798]                            | <0.0001  |
| Serum creatinine (µmol/L)                  | 56.2±14.9                                         | 81.2±17.7                              | <0.0001  | 51.7 ± 14.5                    | 65.6 ± 11.0                            | <0.0001  |
| eGFR (ml/min/1.73m <sup>2</sup> )          | 125.5±20                                          | 95.8±17.9                              | <0.0001  | NA                             | NA                                     |          |
| Measured GFR (ml/min/1.73m <sup>2</sup> )  | NA                                                | NA                                     |          | 115.7 ± 34.7                   | 100.2 ± 19.7                           | 0.0146   |
| Serum phosphate (mmol/L)                   | 1.12±0.18                                         | 1.13±0.25                              | 0.727    | 1.14 ± 0.19                    | 1.07 ± 0.15                            | 0.0818   |
| Serum calcium (mmol/L)                     | 2.30 ± 0.08                                       | 2.36±0.1                               | <0.0001  | 2.30 ± 0.08                    | 2.30 ± .0.09                           | 0.9087   |
| 25(OH)-vitamin D (ng/mL)                   | 10 [3-39]                                         | 9 [3-33]                               | 0.06     | 9 [3-39]                       | 13 [4-33]                              | 0.2050   |
| Serum calcitriol (pg/mL)                   | 49 [5.0-131.0]                                    | 55.0 [21.0-146.0]                      | 0.0003   | 43 [5.0-131.0]                 | 57 [24-76]                             | 0.3686   |
| cFGF23 (RU/ml) NI < 150 RU/ml              | 419 [35-9944]                                     | 55.0 [15.8-1615.0]                     | <0.0001  | 563 [49-9944]                  | 152 [35-5016]                          | 0.0018   |

Results are expressed as mean ± SD; median [min-max]. BMI: body mass index; eGFR: estimated glomerular filtration rate. SS patients were homozygous for the S mutation. SC, SD, and SB patients had S hemoglobin mutation plus C or D hemoglobin or β-thalassemia trait respectively

**Table 2 : Characteristics of echocardiographic parameters in SCD patients.**

|                                                                        | All SCD patients (n = 77) | SS genotype (n= 52) | non-SS genotype (n = 25) | P (SS versus non-SS) |
|------------------------------------------------------------------------|---------------------------|---------------------|--------------------------|----------------------|
| initial aorta diameter (mm)                                            | 29.6±3.4                  | 30.1±3.5            | 28.6±2.8                 | 0.0416               |
| left atrial diameter (mm)                                              | 34.9±6.8                  | 35.8±7.2            | 33±5.2                   | 0.057                |
| left ventricle end diastolic diameter (mm)                             | 50.9±4.8                  | 52.4±3.8            | 47.8±5.4                 | 0.0001               |
| left ventricle end systolic diameter (mm)                              | 30.6±4.6                  | 32.0±4.2            | 27.6±4.0                 | 0.0001               |
| left ventricular mass indexed to body surface area (g/m <sup>2</sup> ) | 113.1±28.9                | 121.7±26.6          | 95.1±25.1                | 0.0001               |
| left ventricle ejection fraction (%)                                   | 64.7±7.1                  | 63.4±6.9            | 67.4±7                   | 0.0251               |
| fraction of shortening(%)                                              | 40.1±6.2                  | 39.1±6.1            | 42.2±6.1                 | 0.0382               |
| systolic pulmonary arterial pressure (mmHg)                            | 27.3±5.8                  | 28.8±5.7            | 23.6±4.4                 | 0.0006               |
| E (m/s)                                                                | 0.96±0.21                 | 1±0.21              | 0.89±0.18                | 0.0349               |
| A (m/s)                                                                | 0.59±0.14                 | 0.59±0.14           | 0.59±0.14                | 0.888                |
| E' (m/s)                                                               | 0.18±0.08                 | 0.17±0.05           | 0.19±0.13                | 0.4261               |
| E/A                                                                    | 1.71±0.59                 | 1.79±0.77           | 1.59±0.44                | 0.1706               |
| E/E'                                                                   | 5.84 ± 1.86               | 6.12±1.95           | 5.26±1.56                | 0.0562               |

Results are expressed as mean±SD and as median [min-max]. A: late velocity of mitral inflow; E: early velocity of mitral inflow; E': early diastolic velocity of the mitral annulus; SCD: sickle cell disease

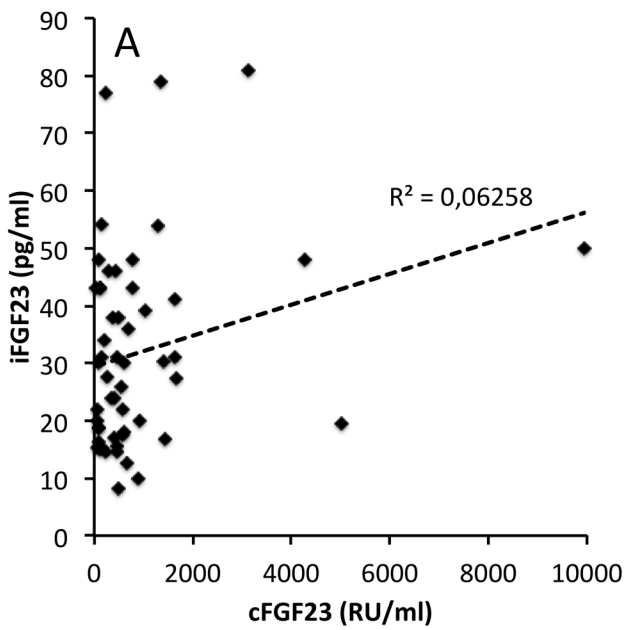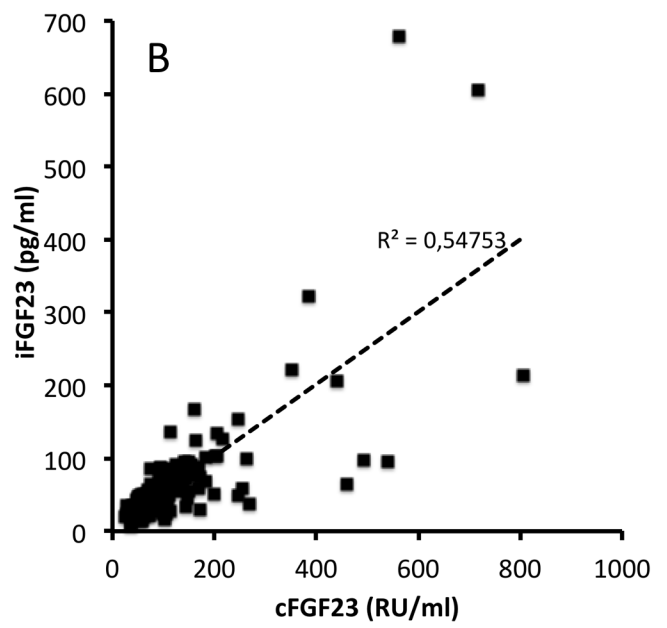

Figure S1: Lack of correlation between cFGF23 and iFGF23 in patients with SCD (A) by comparison with control subjects (B). The coefficient of correlation ( $R^2$ ) is mentioned for each group.

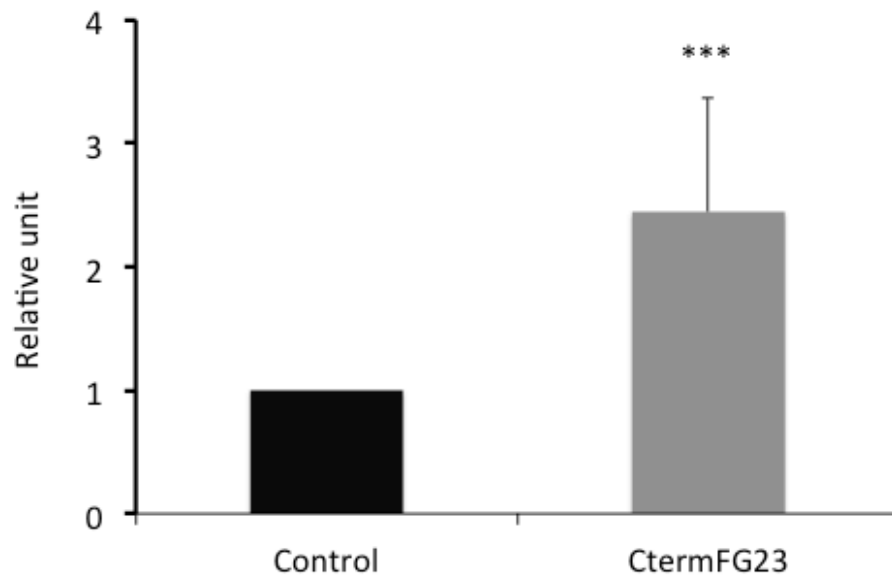

Figure S2: mRNA expression of  $\beta$  myosin Heavy chain  $\beta$  (MHC) in adult rat ventricular myocytes. RT-PCR normalized to YWHAZ.. \*\*\* $p=0.0008$ , Student's t test.
